# Supplementary material for: Poly(etheretherketone)/Poly(ethersulfone) Blends with Phenolphthalein: Miscibility, Thermomechanical Properties, Crystallization and Morphology
Source: MDPI journal article supplement (doi:10.3390/polym13091466), 2021-05-01
Supplement: s1 [file s1]

# Poly(etheretherketone) / Poly(ethersulfone) Blends with Phenolphthalein: Miscibility, Thermomechanical Properties, Crystallization and Morphology

Adrian Korycki <sup>1,2</sup>, Christian Garnier <sup>1</sup>, Amandine Abadie <sup>1</sup>, Valerie Nassiet <sup>1</sup>, Tarek Sultan <sup>2</sup> and France Chabert <sup>1,\*</sup>

<sup>1</sup> LGP-ENIT-INPT, Université de Toulouse, 47 avenue d'Azereix, 65016 Tarbes cedex (France)

<sup>2</sup> Prismadd Montauban, 2 bis rue Georges Courteline, 82000 Montauban (France)

\* Correspondence: france.chabert@enit.fr

List of supporting information:

**Figure S1.** Zoom of DSC thermogram on glass transition temperature for: (a) PEEK/PES 1010G blends; (b) PEEK/PES 3010G blends

**Figure S2.** Zoom of DSC thermogram on glass transition temperature for: (a) PEEK/PES 1010G blends; (b) PEEK/PES 3010G blends, with phenolphthalein

**Figure S3.** DSC thermograms of pure: (a) PEEK; (b,c) PES, with and without Phph

**Figure S4.** Glass transition of: (a) PES; (b,c) PEEK, versus Phenolphthalein composition

**Figure S5.** FTIR spectra of pure polymer with and without Phph

**Figure S6.** DSC thermogram of phenolphthalein

**Figure S7.** Thermal resistance of phenolphthalein by TGA

Supplementary 1 (Figure 2):

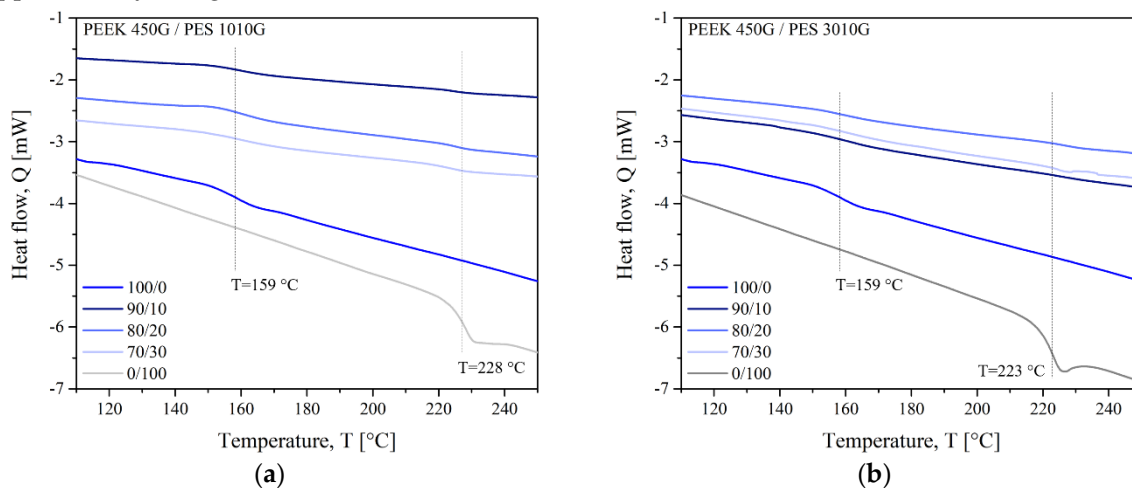

**Figure S1.** Zoom of DSC thermogram on glass transition temperature for: (a) PEEK/PES 1010G blends; (b) PEEK/PES 3010G blends

Supplementary 2 (Figure 6):

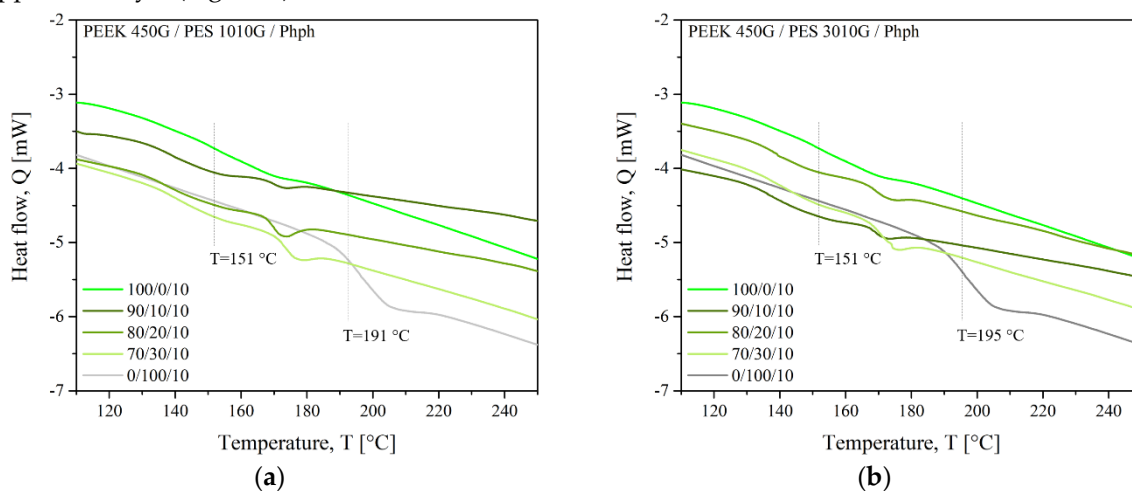

**Figure S2.** Zoom of DSC thermogram on glass transition temperature for: (a) PEEK/PES 1010G blends; (b) PEEK/PES 3010G blends, with phenolphthalein

Supplementary 3 (Figure 6):

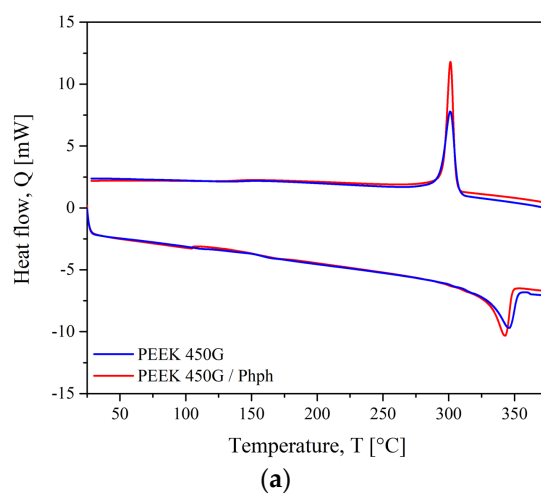

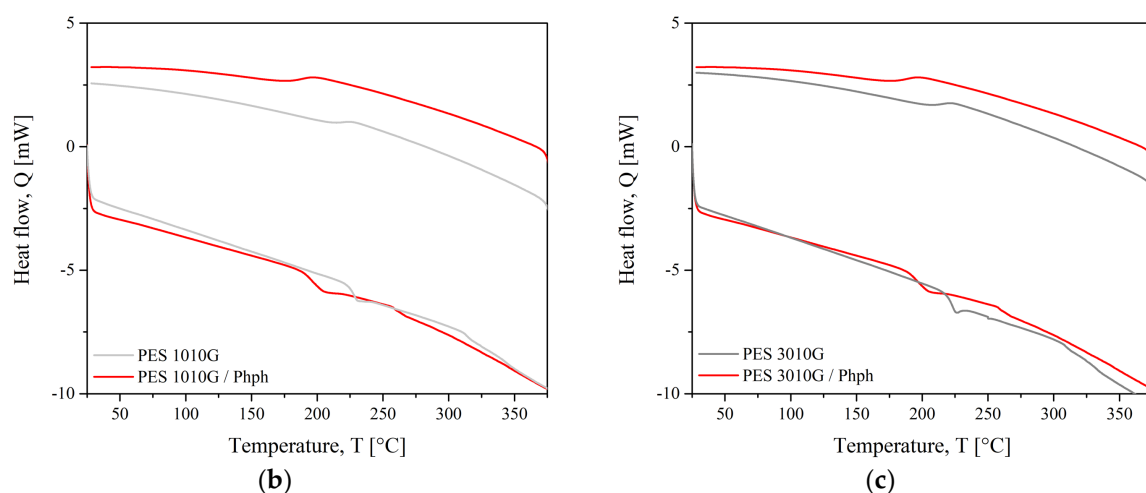

**Figure S3.** DSC thermograms of pure: (a) PEEK; (b,c) PES, with and without Phph

Supplementary 4 (Figure 7):

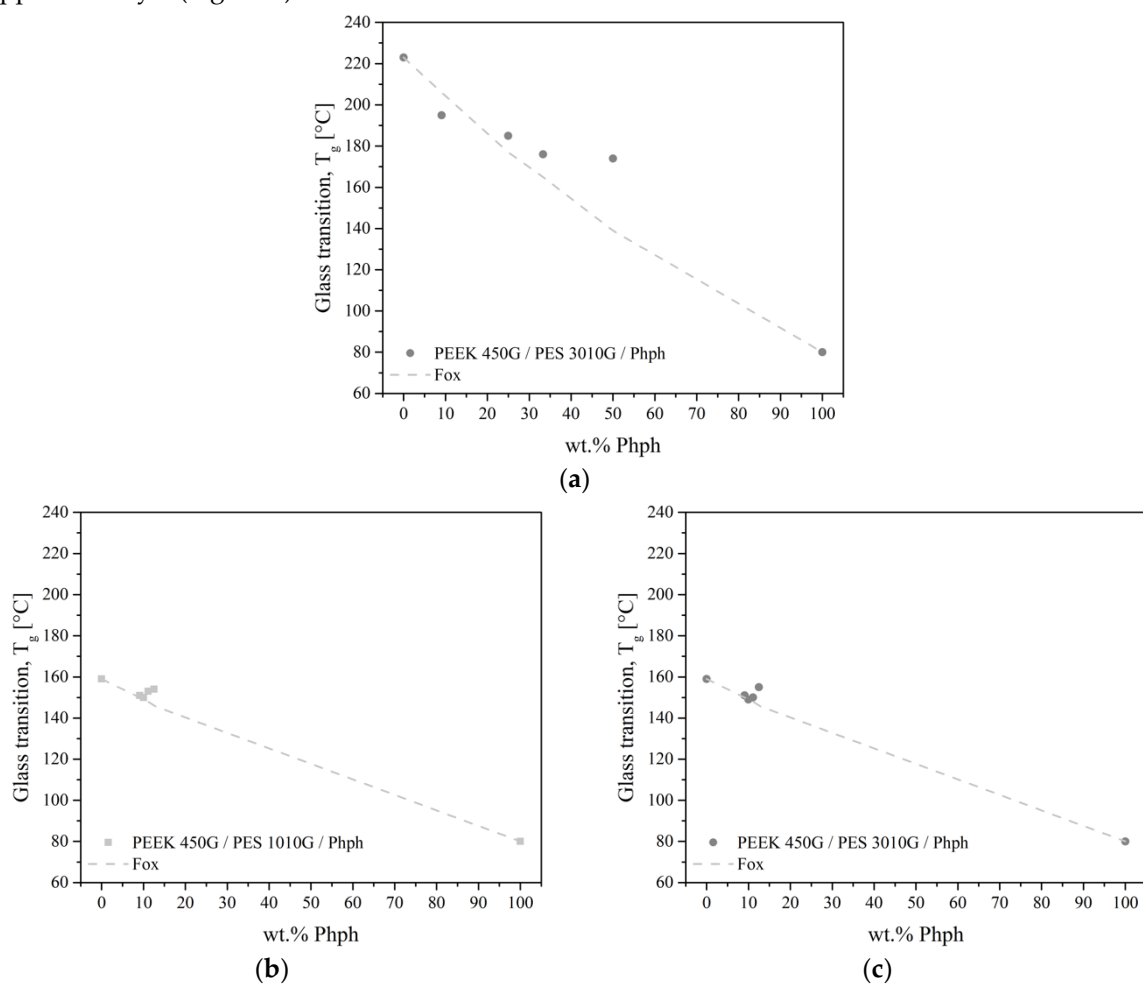

**Figure S4.** Glass transition of: (a) PES; (b,c) PEEK, versus Phenolphthalein composition

Supplementary 5 (Figure 9):

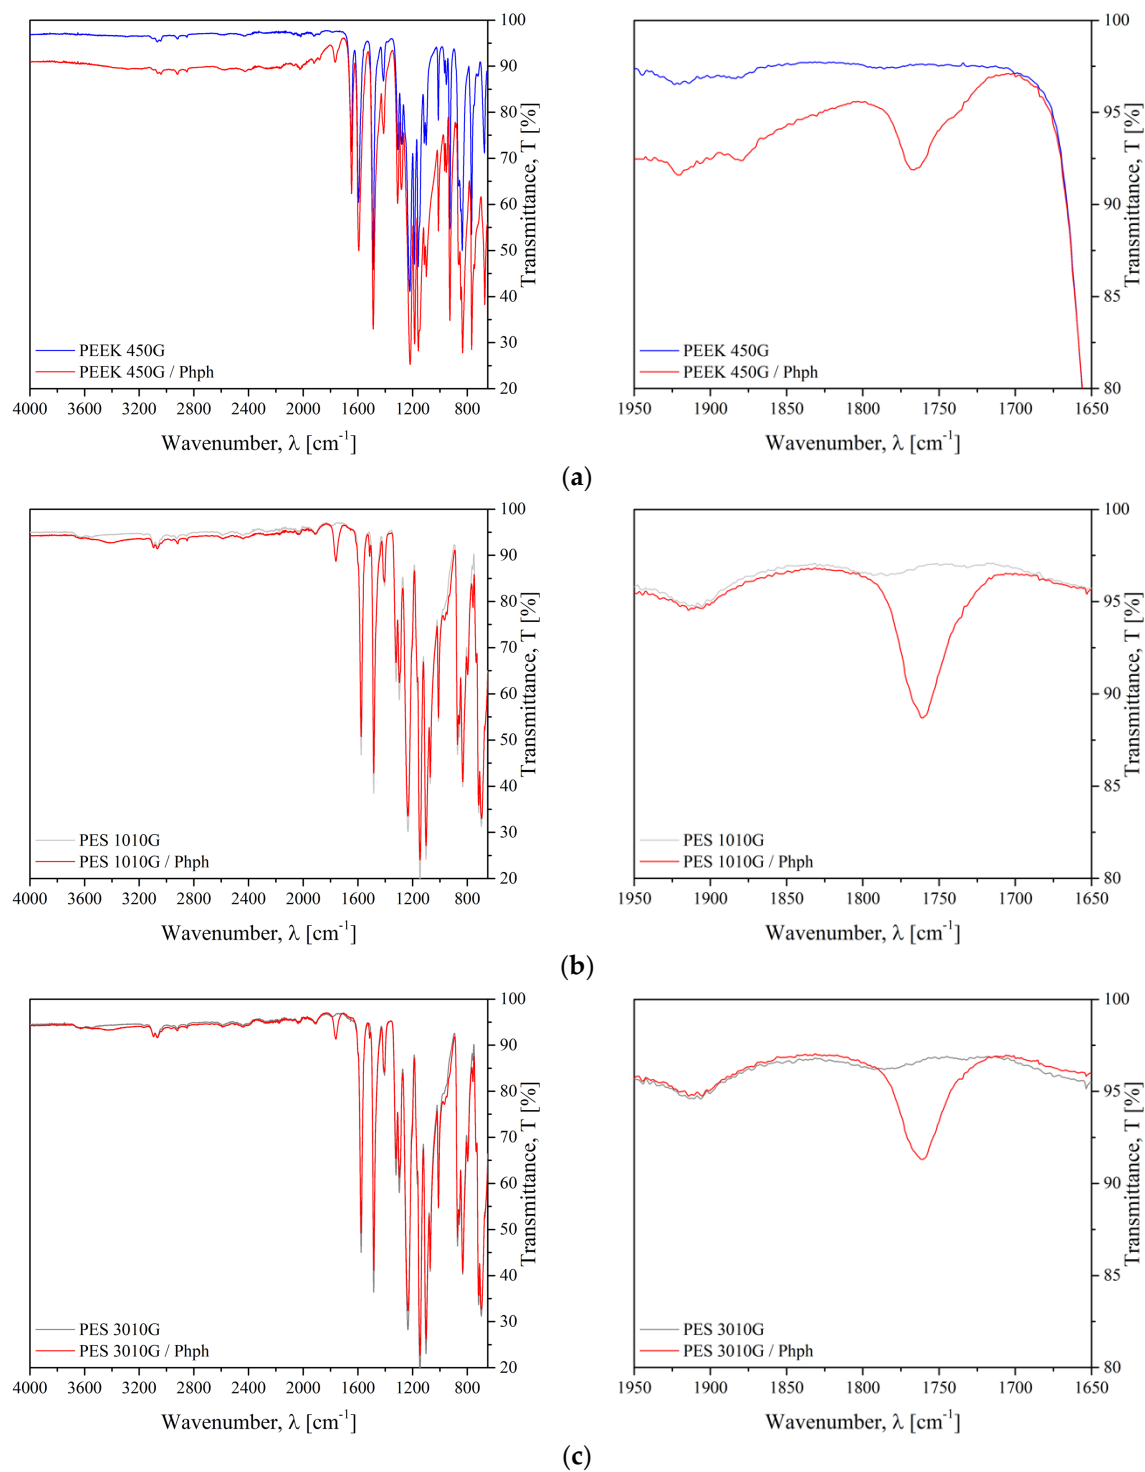

**Figure S5.** FTIR spectra of pure polymer with and without Phph

Supplementary 6 (Figure 13):

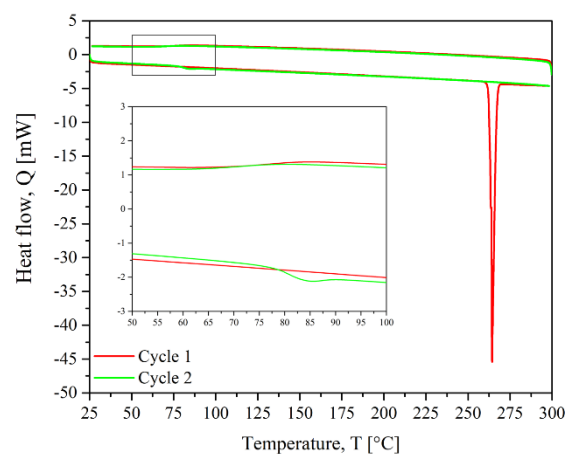

**Figure S6.** DSC thermogram of phenolphthalein

Supplementary 7 (Figure 13):

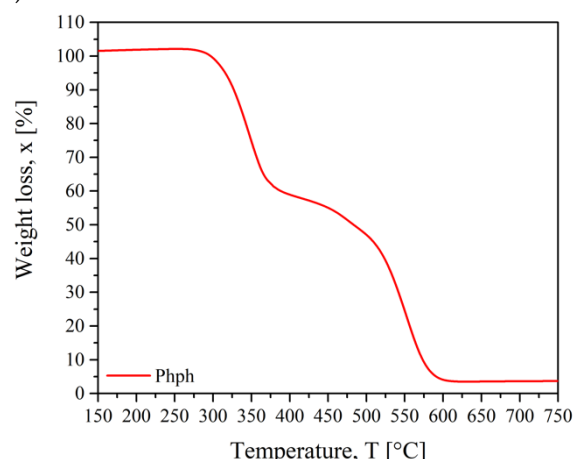

**Figure S7.** Thermal resistance of phenolphthalein by TGA
